# Supplementary material
Source: publisher figshare collection journal article supplement (https://acs.figshare.com/ndownloader/files/4710460)
Supplement: Supplementary file 1 [file 4710460]

## A Disjoining Pressure Study of Foam Films Stabilized by Mixtures of Non-Ionic and Ionic Surfactants

Natalie Buchavzov <sup>1</sup>, Cosima Stubenrauch <sup>2\*</sup>

<sup>1</sup> *Institut für Physikalische Chemie, Universität zu Köln, Luxemburger Str. 116,  
D-50939 Köln, Germany*

<sup>2</sup> *University College Dublin, School of Chemical and Bioprocess Engineering,  
Belfield, Dublin 4, Ireland*

### Supporting Information Available

In this study the cmc values for  $\beta$ -C<sub>12</sub>G<sub>2</sub>:C<sub>12</sub>TAB mixtures were experimentally obtained by measuring the respective  $\sigma$ - $c$  curves. If  $\alpha$  is the mole fraction of C<sub>12</sub>TAB in the solution, then the cmc of the mixture is predicted [1] to be

$$\text{cmc}_{\text{mix}} = \frac{1}{\frac{\alpha}{\text{cmc}(\text{C}_{12}\text{TAB})} + \frac{(1-\alpha)}{\text{cmc}(\text{C}_{12}\text{G}_2)}} \quad (\text{A1})$$

Eq.A1 is based on a very simple model, which assumes ideal mixing. Deviations from eq.A1 are only expected if there is a large interaction parameter associate with the system [1], which is not the case for cationic / non-ionic surfactant mixtures in general and for C<sub>12</sub>TAB (or C<sub>12</sub>TACl) /  $\beta$ -C<sub>12</sub>G<sub>2</sub> in particular [2,3]. The interaction parameter for the mixture of C<sub>12</sub>TAB and  $\beta$ -C<sub>12</sub>G<sub>2</sub> was found to decrease from -1.54 to -0.43 with increasing amount of  $\beta$ -C<sub>12</sub>G<sub>2</sub> indicating weak surfactant interaction and almost ideal behaviour especially at high  $\beta$ -C<sub>12</sub>G<sub>2</sub> content [3]. In Fig.A1 the experimental cmc values of the surfactant mixtures as well as those calculated with eq.A1 are shown. As is seen, the  $\beta$ -C<sub>12</sub>G<sub>2</sub> + C<sub>12</sub>TAB mixture can be treated as an ideal mixture which is in agreement with the results obtained by other authors (see Fig.5 in [3]).

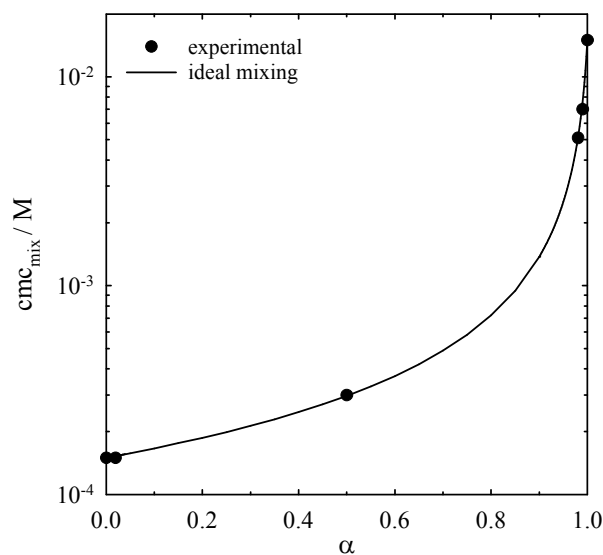

**Fig.A1:** Comparison of experimental cmc values for the  $\beta\text{-C}_{12}\text{G}_2 + \text{C}_{12}\text{TAB}$  mixtures with those calculated by assuming ideal mixing of the components.

This information is available free of charge via the Internet at <http://pubs.acs.org>.

## References

- [1] Rubingh, D.N. In *Solution Chemistry of Surfactants*; Mittal, K.L., Ed.; Plenum Press: New York, 1979; Vol.1, pp 337-354.
- [2] Rosen, M.J.; Sulthana, S.B. *J. Colloid Interface Sci.* **2001**, 239, 528.
- [3] Zhang, R.; Zhang, L.; Somasundaran, P *J. Colloid Interface Sci.* **2004**, 278, 453.
